# Supplementary material for: Long-term efficacy and tolerability of TNFα inhibitors in the treatment of non-infectious ocular inflammation: an 8-year prospective surveillance study
Source: PubMed Central journal article supplement — Br J Ophthalmol. 2019 Mar 12;105(9):1256–62. doi: 10.1136/bjophthalmol-2018-312767 (PMC8380906; doi:10.1136/bjophthalmol-2018-312767), 2019-03-12
Supplement: bjophthalmol-2018-312767supp001.pdf [file bjophthalmol-2018-312767supp001.pdf]

Suppl. Table 1 Patient disease characteristics at baseline

| Patient | Age (years) | Duration of ocular inflammatory disease up to index date (years) | Aetiology (activity of underlying disease) | Duration of systemic inflammation (years) | Anatomic Classification of Uveitis | Uveitis phenotype                                       | Co-morbidities         | Smoking status | Visual acuity at baseline | Vitreous haze score | Indication for starting biologic therapy                       | Unilateral or bilateral disease | Duration of biologic therapy (years) | Immunosuppressive therapy at baseline                     |
|---------|-------------|------------------------------------------------------------------|--------------------------------------------|-------------------------------------------|------------------------------------|---------------------------------------------------------|------------------------|----------------|---------------------------|---------------------|----------------------------------------------------------------|---------------------------------|--------------------------------------|-----------------------------------------------------------|
| 1       | 32          | 3                                                                | Behcet's disease (active)                  | 4                                         | Posterior uveitis                  | Retinal vasculitis (macula-involving)                   | None                   | Current smoker | RE 0, LE 0                | RE 0, LE 0          | Intolerance to other immunosuppression                         | Missing                         | 10                                   | Prednisolone 20mg<br>Tacrolimus 2mg<br>Mycophenolate 1.5g |
| 2       | 38          | 5                                                                | Ankylosing spondylitis (active)            | 9                                         | Anterior uveitis                   | Anterior inflammation                                   | Epi-retinal membrane   | Ex-smoker      | RE 0.3, LE 0.5            | RE 0, LE 0          | Intolerance to other immunosuppression                         | Unilateral (RE)                 | 8                                    | Methotrexate 10mg                                         |
| 3       | 45          | 10                                                               | Idiopathic                                 | Not applicable                            | Posterior uveitis                  | Retinal vasculitis (occlusive, macula-involving)        | Epi-retinal membrane   | Ex-smoker      | RE 0.5, LE 0              | RE 0, LE 0          | Failure to control inflammation<br>Early aggressive sight loss | Bilateral                       | 7                                    | Prednisolone 10mg<br>Tacrolimus 4mg<br>Mycophenolate 2g   |
| 4       | 26          | 3                                                                | Behcet's disease (active)                  | 4                                         | Posterior uveitis                  | Retinal vasculitis (occlusive, peripheral)              | None                   | Never smoked   | RE -0.2, LE -0.2          | RE 0, LE 0          | Failure to control inflammation                                | Bilateral                       | 9                                    | Prednisolone 25mg<br>Tacrolimus 6mg<br>Mycophenolate 2g   |
| 5       | 38          | 1                                                                | Behcet's disease (active)                  | 0                                         | Panuveitis                         | Retinal vasculitis (macula-involving)                   | None                   | Current smoker | RE 0.5, LE 0              | RE 0, LE 0          | Intolerance to other immunosuppression                         | Bilateral                       | 11                                   | Prednisolone 15mg<br>Tacrolimus 2mg                       |
| 6       | 43          | 5                                                                | Behcet's disease (active)                  | 1                                         | Posterior uveitis                  | Retinal vasculitis (occlusive, peripheral)              | Epi-retinal membrane   | Ex-smoker      | RE -0.1, LE 0.5           | RE 0, LE 0          | Failure to control inflammation                                | Missing                         | 3                                    | Prednisolone 20mg<br>Tacrolimus 4mg<br>Mycophenolate 2g   |
| 7       | 52          | 7                                                                | Psoriatic arthropathy (active)             | 16                                        | Intermediate uveitis               | None                                                    | Glaucoma<br>Cataract   | Never smoked   | RE 0.7, LE 0.2            | RE 3, LE 0          | Failure to control inflammation                                | Bilateral                       | 9                                    | Methotrexate 20mg                                         |
| 8       | 47          | 2                                                                | Behcet's disease (active)                  | 1                                         | Posterior uveitis                  | Retinal vasculitis (occlusive, peripheral)              | Glaucoma               | Never smoked   | RE 1.3, LE 0.2            | RE 0, LE 0          | Intolerance to other immunosuppression                         | Bilateral                       | 10                                   | Prednisolone 20mg<br>Tacrolimus 2mg                       |
| 9       | 62          | 1                                                                | Undifferentiated arthritis (active)        | 2                                         | Scleritis                          | None                                                    | None                   | Ex-smoker      | RE 1.5, LE 0.8            | RE 0, LE 0          | Failure to control inflammation                                | Bilateral                       | 10                                   | Methotrexate 20mg                                         |
| 10      | 41          | 4                                                                | Idiopathic                                 | Not applicable                            | Posterior uveitis                  | Retinal vasculitis (occlusive, peripheral)<br>Vitreitis | Cystoid macular oedema | Current smoker | RE 0, LE 0.3              | RE 0, LE 0          | Failure to control inflammation                                | Bilateral                       | 9                                    | Prednisolone 15mg<br>Cyclosporine 300mg                   |

|    |    |    |                           |                |                      |                                                  |                                                           |                |                |            |                                                                           |                 |    |                                                              |
|----|----|----|---------------------------|----------------|----------------------|--------------------------------------------------|-----------------------------------------------------------|----------------|----------------|------------|---------------------------------------------------------------------------|-----------------|----|--------------------------------------------------------------|
| 11 | 25 | 3  | Behcet's disease (active) | 3              | Posterior uveitis    | Retinal vasculitis (peripheral)                  | Epiretinal membrane                                       | Missing        | RE 0, LE 0     | RE 0, LE 0 | Failure to control inflammation                                           | Bilateral       | 8  | Tacrolimus 6mg<br>Mycophenolate 3g                           |
| 12 | 24 | 6  | Idiopathic                | Not applicable | Panuveitis           | Retinal vasculitis (peripheral)                  | Cataract                                                  | Missing        | RE 0.2, LE 0.2 | RE 1, LE 2 | Failure to control inflammation<br>Intolerance to other immunosuppression | Missing         | 10 | Prednisolone 40mg<br>Methotrexate 20mg                       |
| 13 | 47 | 10 | Idiopathic                | Not applicable | Posterior uveitis    | None                                             | Cystoid macular oedema<br>Epiretinal membrane             | Ex-smoker      | RE 0.8, LE 1   | RE 0, LE 0 | Failure to control inflammation                                           | Bilateral       | 7  | Prednisolone 15mg<br>Tacrolimus 5mg                          |
| 14 | 51 | 10 | Idiopathic                | Not applicable | Posterior uveitis    | Retinal vasculitis (occlusive, macula-involving) | Choroidal neovascularisation                              | Missing        | RE 0.8, LE 0.8 | RE 0, LE 0 | Failure to control inflammation                                           | Missing         | 1  | Prednisolone 8mg<br>Tacrolimus 6mg<br>Mycophenolate 2g       |
| 15 | 40 | 9  | Behcet's disease (active) | 10             | Panuveitis           | Retinal vasculitis (macula-involving)            | Epiretinal membrane<br>Cystoid macular oedema             | Current smoker | RE 0.8, LE 1.5 | RE 1, LE 1 | Failure to control inflammation<br>Intolerance to other immunosuppression | Bilateral       | 12 | Prednisolone 30mg<br>Cyclosporine 150mg<br>Mycophenolate 3g  |
| 16 | 29 | 2  | Idiopathic                | Not applicable | Posterior uveitis    | Missing                                          | Missing                                                   | Missing        | Missing        | Missing    | Missing                                                                   | Missing         | 5  | Prednisolone 8mg<br>Tacrolimus 4mg<br>Mycophenolate 2g       |
| 17 | 33 | 3  | Idiopathic                | Not applicable | Posterior uveitis    | Retinal vasculitis (occlusive, macula-involving) | None                                                      | Current smoker | RE 0.2, LE 0   | RE 0, LE 0 | Early aggressive sight loss                                               | Bilateral       | 3  | Prednisolone 60mg<br>Tacrolimus 3mg<br>Mycophenolate 2g      |
| 18 | 18 | 10 | JIA (active)              | 15             | Anterior uveitis     | None                                             | None                                                      | Never smoked   | RE 0, LE -0.1  | RE 0, LE 0 | Missing                                                                   | Bilateral       | 7  | Prednisolone 10mg<br>Mycophenolate 2g<br>Methotrexate 17.5mg |
| 19 | 53 | 1  | Behcet's disease (active) | 7              | Posterior uveitis    | Retinal vasculitis (peripheral)                  | Cataract<br>Epiretinal membrane                           | Missing        | RE 0.2, LE 0.3 | RE 0, LE 0 | Intolerance to other immunosuppression                                    | Bilateral       | 7  | Prednisolone 10mg<br>Tacrolimus 4mg<br>Mycophenolate 2g      |
| 20 | 31 | 18 | JIA (active)              | 20             | Intermediate uveitis | Anterior inflammation                            | Glaucoma<br>Cataract                                      | Never smoked   | RE 0.5, LE 3   | RE 0, LE 0 | Failure to control inflammation                                           | Bilateral       | 7  | Prednisolone 30mg<br>Mycophenolate 3g<br>Methotrexate 25mg   |
| 21 | 22 | 13 | Idiopathic                | Not applicable | Intermediate uveitis | Retinal vasculitis (macula-involving)            | Ocular hypertension<br>Cataract<br>Cystoid macular oedema | Never smoked   | RE 0.2, LE 0.2 | RE 0, LE 0 | Failure to control inflammation<br>Intolerance to other immunosuppression | Bilateral       | 9  | Cyclosporine 150mg<br>Mycophenolate 1.5g                     |
| 22 | 34 | 1  | Behcet's disease (active) | 1              | Panuveitis           | Anterior inflammation<br>Vitreitis               | Epiretinal membrane                                       | Missing        | RE 0.1, LE 0.1 | RE 0, LE 0 | Early aggressive sight loss                                               | Unilateral (LE) | 7  | Prednisolone 5mg<br>Tacrolimus 4mg<br>Mycophenolate 2g       |

|    |    |    |                                            |                   |                         |                                                                                                           |                                                                                |                   |                     |                   |                                                                             |                        |   |                                                             |
|----|----|----|--------------------------------------------|-------------------|-------------------------|-----------------------------------------------------------------------------------------------------------|--------------------------------------------------------------------------------|-------------------|---------------------|-------------------|-----------------------------------------------------------------------------|------------------------|---|-------------------------------------------------------------|
|    |    |    |                                            |                   |                         | Retinal<br>vasculitis<br>(peripheral<br>)                                                                 |                                                                                |                   |                     |                   |                                                                             |                        |   |                                                             |
| 23 | 52 | 10 | Idiopathic                                 | Missing           | Intermediate<br>uveitis | Vitritis                                                                                                  | Cataract<br>Epiretinal<br>membrane<br>Cystoid<br>macular<br>oedema             | Never<br>smoked   | RE 0.6, LE 0.2      | RE 0, LE 0        | Failure to control<br>inflammation                                          | Bilateral              | 7 | Prednisolone 20mg<br>Tacrolimus 4mg<br>Mycophenolate 3g     |
| 24 | 58 | 1  | ANCA<br>negative<br>vasculitis -<br>active | 1                 | Scleritis               | None                                                                                                      | None                                                                           | Missing           | RE 0, LE 0          | RE 0, LE 0        | Failure to control<br>inflammation                                          | Bilateral              | 8 | Prednisolone 25mg<br>Azathioprine 100mg                     |
| 25 | 20 | 7  | Idiopathic                                 | Not<br>applicable | Intermediate<br>uveitis | Vitritis                                                                                                  | Glaucoma                                                                       | Never<br>smoked   | RE 0, LE 0.6        | RE 0, LE 0        | Failure to control<br>inflammation                                          | Bilateral              | 9 | Prednisolone 7.5mg<br>Tacrolimus 4mg<br>Mycophenolate 2g    |
| 26 | 44 | 2  | Behcet's<br>disease<br>(active)            | 0                 | Panuveitis              | Retinal<br>vasculitis<br>(occlusive,<br>macula-<br>involving)<br>Vitritis<br>Anterior<br>inflammati<br>on | Cystoid<br>macular<br>oedema                                                   | Never<br>smoked   | RE 2, LE 3          | RE 0, LE 4        | Intolerance to other<br>immunosuppression<br>Early aggressive sight<br>loss | Alternating<br>disease | 6 | Prednisolone 30mg<br>Tacrolimus 2mg<br>Mycophenolate 1g     |
| 27 | 28 | 2  | Idiopathic -<br>mouth<br>ulceration        | 2                 | Intermediate<br>uveitis | Vitritis                                                                                                  | Cystoid<br>macular<br>oedema                                                   | Ex-smoker         | RE 0.1, LE 0.1      | RE 1, LE 1        | Failure to control<br>inflammation                                          | Bilateral              | 5 | Tacrolimus 4mg<br>Mycophenolate 3g                          |
| 28 | 38 | 1  | Idiopathic                                 | Not<br>applicable | Posterior uveitis       | Retinal<br>vasculitis<br>(occlusive,<br>peripheral)                                                       | Cystoid<br>macular<br>oedema                                                   | Current<br>smoker | RE 0.48, LE 0.3     | RE 0, LE 0        | Failure to control<br>inflammation<br>Early aggressive sight<br>loss        | Bilateral              | 6 | Tacrolimus 2mg<br>Mycophenolate 1g                          |
| 29 | 40 | 3  | Behcet's<br>disease<br>(active)            | 3                 | Panuveitis              | Retinal<br>vasculitis<br>(peripheral<br>)                                                                 | None                                                                           | Current<br>smoker | RE 2.5, LE 2.5      | RE 0, LE 0        | Failure to control<br>inflammation<br>High dose steroid<br>requirement      | Bilateral              | 9 | Prednisolone 50mg<br>Cyclosporine 300mg                     |
| 30 | 41 | 0  | Psoriatic<br>arthropathy<br>(active)       | 6                 | Scleritis               | None                                                                                                      | None                                                                           | Never<br>smoked   | RE 0.2, LE 0.2      | RE 0, LE 0        | Early aggressive sight<br>loss                                              | Unilateral<br>(RE)     | 6 | Prednisolone 20mg<br>Methotrexate 20mg                      |
| 31 | 41 | 0  | Idiopathic                                 | Not<br>applicable | Posterior uveitis       | Retinal<br>vasculitis<br>(occlusive,<br>peripheral)                                                       | None                                                                           | Ex-smoker         | RE 1, LE -0.1       | RE 0.5, LE<br>0.5 | Early aggressive sight<br>loss                                              | Bilateral              | 6 | Prednisolone 5mg<br>Mycophenolate 2g<br>Methotrexate 12.5mg |
| 32 | 32 | 8  | Idiopathic                                 | Not<br>applicable | Intermediate<br>uveitis | Anterior<br>inflammati<br>on<br>Vitritis                                                                  | Glaucoma<br>Cataract<br>Epiretinal<br>membrane<br>Cystoid<br>macular<br>oedema | Missing           | Missing             | RE 0, LE 0        | Failure to control<br>inflammation                                          | Bilateral              | 1 | Prednisolone 10mg<br>Tacrolimus 2mg<br>Mycophenolate 3g     |
| 33 | 47 | 1  | Behcet's<br>disease<br>(active)            | 1                 | Anterior uveitis        | Anterior<br>inflammati<br>on                                                                              | None                                                                           | Never<br>smoked   | RE 0.15, LE<br>0.15 | RE 0, LE 0        | Failure to control<br>inflammation                                          | Bilateral              | 8 | Prednisolone 10mg<br>Methotrexate 20mg                      |

|    |    |         |                                  |                |                      |                                                           |                                                                                  |                |                  |                |                                                                       |                 |   |                                                          |
|----|----|---------|----------------------------------|----------------|----------------------|-----------------------------------------------------------|----------------------------------------------------------------------------------|----------------|------------------|----------------|-----------------------------------------------------------------------|-----------------|---|----------------------------------------------------------|
| 34 | 20 | 8       | Juvenile sarcoidosis (active)    | 8              | Panuveitis           | Anterior inflammation<br>Vitreitis                        | Cataract<br>Hypotony<br>Optic disc swelling<br>Optic atrophy                     | Never smoked   | RE 0.3, LE 1     | RE 0, LE 0     | Failure to control inflammation                                       | Bilateral       | 6 | Prednisolone 20mg<br>Methotrexate 20mg                   |
| 35 | 32 | 0       | Behcet's disease (active)        | 3              | Posterior uveitis    | Retinal vasculitis (macula-involving)                     | None                                                                             | Current smoker | RE 0, LE 1.25    | RE 0, LE 0     | Intolerance to other immunosuppression<br>Early aggressive sight loss | Unilateral (LE) | 3 | Prednisolone 20mg<br>Tacrolimus 2mg                      |
| 36 | 23 | 6       | Idiopathic - no systemic disease | Not applicable | Panuveitis           | Vitreitis                                                 | Glaucoma<br>Cataract<br>Epiretinal membrane                                      | Missing        | RE 0.6, LE 0.3   | RE 1, LE 1     | Failure to control inflammation                                       | Bilateral       | 5 | Tacrolimus 2mg<br>Mycophenolate 2g                       |
| 37 | 47 | 1       | Idiopathic - CNS involvement     | 1              | Panuveitis           | Retinal vasculitis (peripheral)<br>Choroidal inflammation | None                                                                             | Never smoked   | RE 0.9, LE 0.7   | RE 0.5, LE 0.5 | Failure to control inflammation                                       | Bilateral       | 4 | Tacrolimus 3mg<br>Mycophenolate 2g                       |
| 38 | 54 | 0       | Idiopathic                       | Not applicable | Scleritis            | None                                                      | Cataract                                                                         | Never smoked   | RE 0.1, LE 0.8   | RE 0, LE 0     | Intolerance to other immunosuppression                                | Unilateral      | 5 | Prednisolone 10mg<br>Methotrexate 15mg                   |
| 39 | 45 | 4       | Behcet's disease (active)        | Missing        | Panuveitis           | Retinal vasculitis (peripheral)                           | Epiretinal membrane<br>Cystoid macular oedema                                    | Never smoked   | RE -0.1, LE -0.1 | RE 0, LE 0     | Failure to control inflammation<br>High dose steroid requirement      | Bilateral       | 5 | Prednisolone 7.5mg<br>Tacrolimus 4mg<br>Mycophenolate 3g |
| 40 | 51 | 5       | Sarcoidosis (active)             | 5              | Panuveitis           | Anterior inflammation<br>Vitreitis                        | Ocular hypertension<br>Cataract<br>Epiretinal membrane<br>Cystoid macular oedema | Missing        | RE 0.7, LE 0.2   | RE 1, LE 0.5   | Failure to control inflammation                                       | Bilateral       | 4 | Prednisolone 15mg<br>Tacrolimus 3mg<br>Mycophenolate 3g  |
| 41 | 57 | 3       | Behcet's disease - (active)      | 0              | Panuveitis           | Retinal vasculitis (occlusive, peripheral)<br>Vitreitis   | Cataract<br>Cystoid macular oedema                                               | Never smoked   | RE 2, LE 0.9     | RE 1, LE 0     | Failure to control inflammation                                       | Bilateral       | 3 | Tacrolimus 4mg<br>Mycophenolate 3g                       |
| 42 | 52 | Missing | Idiopathic                       | Not applicable | Missing              | Missing                                                   | Epiretinal membrane<br>Cystoid macular oedema                                    | Missing        | RE 0.6, LE 0.6   | RE 0, LE 0     | Intolerance to other immunosuppression                                | Missing         | 3 | Prednisolone 7.5mg                                       |
| 43 | 18 | 8       | Idiopathic                       | Not applicable | Intermediate uveitis | Vitreitis                                                 | Epiretinal membrane<br>Cystoid macular oedema                                    | Missing        | RE 0.6, LE 0.7   | RE 1, LE 1     | Intolerance to other immunosuppression                                | Bilateral       | 3 | None                                                     |

**Suppl. Table 2****Comparison of Immunomodulatory treatment, oral corticosteroids and topical treatments prior to commencement of TNFi (baseline visit) and during TNFi therapy**

| <b>Medication</b>                   | Prior to TNFi | %    | Concomitant with TNFi | %    |
|-------------------------------------|---------------|------|-----------------------|------|
| Prednisolone >10mg PO/day           | 22            | 51.1 | 6                     | 14   |
| Prednisolone 1-10mg PO/day          | 18            | 41.8 | 23                    | 53.5 |
| Prednisolone 0mg                    |               |      | 15                    |      |
| 1 immunomodulatory medications*     | 15            | 37.2 | 25                    | 58.1 |
| 2 immunomodulatory medications *    | 25            | 58.1 | 11                    | 25.6 |
| Topical Steroid                     | 17            | 38.6 | 7                     | 16.3 |
| Topical Antihypertensive Medication | 9             | 20.5 | 11                    | 25.6 |

**Suppl. Table 2: Comparison of Immunomodulatory treatment, oral corticosteroids and topical treatments prior to commencement of TNFi (baseline visit) and during TNFi therapy**

| Medication                          | Prior to TNFi | %  | Concomitant with TNFi | %    |
|-------------------------------------|---------------|----|-----------------------|------|
| Prednisolone >10mg PO/day           | 22            | 51 | 6                     | 14   |
| Prednisolone 1-10mg PO/day          | 18            | 42 | 23                    | 53.5 |
| Prednisolone 0mg                    | 4             | 9  | 15                    | 39   |
| 1 immunomodulatory medications*     | 15            | 37 | 25                    | 58.1 |
| 2 immunomodulatory medications *    | 25            | 58 | 11                    | 25.6 |
| Topical Steroid                     | 17            | 39 | 7                     | 16.3 |
| Topical Antihypertensive Medication | 9             | 21 | 11                    | 25.6 |

**Suppl. Table 3 Baseline and census visual acuities in patients who lost vision.**

| Patient | Baseline VA | Visual Acuity at Census |
|---------|-------------|-------------------------|
| 5       | 0.0         | 1.00                    |
| 8       | 0.2         | 2.00                    |
| 13      | 0.8         | 1.60                    |
| 15      | 0.8         | 1.26                    |
| 18      | -0.1        | 0.30                    |
| 27      | 0.1         | 0.10                    |

|    |     |      |
|----|-----|------|
| 29 | 2.5 | 3.00 |
| 34 | 0.3 | 0.70 |
| 36 | 0.3 | 0.6  |
